# Supplementary material
Source: ML conference proceedings conference paper supplement (https://openreview.net/forum?id=1FdAbS4FoQ)
Supplement: supplementary_material [file attachment]

# Fast Amortized Fitting of Scientific Signals Across Time and Ensembles via Transferable Neural Fields

## Supplementary Material

### 584 7. Additional Training Details

#### 585 7.1. Model Considerations

586 In addition to **SIREN** [15] and **K-Planes** [6], we use a  
587 modified **fhash** encoder [18] as our spatial encoding-based  
588 model. Fhash builds on multi-resolution hash encodings  
589 (e.g., tiny-cuda-nn [11]) and has been shown to be effective  
590 for representing spatiotemporal data. We adapt the fhash  
591 implementation to support 5D inputs for our experiments.  
592 We summarize the training settings for one dataset per cat-  
593 egory below.

#### 594 7.2. Time-Evolving Toy Signal

595 We summarize training configurations for the Schwefel ex-  
596 periments described in Section 3.1 below (Table 7).

#### 597 7.3. Rayleigh–Taylor Instability

598 We summarize training configurations for the Rayleigh–  
599 Taylor instability experiments described in Section 3.2 be-  
600 low (Table 8).

#### 601 7.4. Deep Water Asteroid Impact

602 We summarize training configurations for **Deep Water As-**  
603 **teroid Impact** experiments described in Section 4.3 below  
604 (Table 9)

### 605 8. Dataset Visualization: Time-Evolving Toy 606 Signal

607 We visualize the time-evolving Schwefel function under the  
608 transformations described in Section 3.1. Each transfor-  
609 mation produces a sequence of signals with progressively  
610 increasing variation over time while preserving underly-  
611 ing structure. These controlled evolutions provide an inter-  
612 pretable setting for analyzing how representations capture  
613 and transfer structure across timesteps.

Table 7. Model and training settings for the time-evolving **Schwefel** dataset.

| Component              | Value              |
|------------------------|--------------------|
| Compression Ratio      | $\sim 2\times$     |
| Training Iterations    | 4,000              |
| Batch Size             | 65,536 coordinates |
| Optimizer              | Adam               |
| Learning Rate          | $1 \times 10^{-4}$ |
| Loss                   | $\ell_1$           |
| $\omega_0$ (for SIREN) | 10                 |

Table 8. Shared training settings for the **Rayleigh–Taylor instability** dataset.

| Component              | Value               |
|------------------------|---------------------|
| Compression Ratio      | $\sim 53\times$     |
| Training Iterations    | 100,000             |
| Batch Size             | 200,000 coordinates |
| Optimizer              | Adam                |
| Learning Rate          | $1 \times 10^{-3}$  |
| Loss                   | $\ell_1$            |
| $\omega_0$ (for SIREN) | 30                  |

Table 9. Shared training settings for the **Deep Water Asteroid Impact** dataset.

| Component              | Value                 |
|------------------------|-----------------------|
| Compression Ratio      | $\sim 10\times$       |
| Training Iterations    | 100,000               |
| Batch Size             | 2,000,000 coordinates |
| Optimizer              | Adam                  |
| Learning Rate          | $1 \times 10^{-4}$    |
| Loss                   | $\ell_1$              |
| $\omega_0$ (for SIREN) | 30                    |

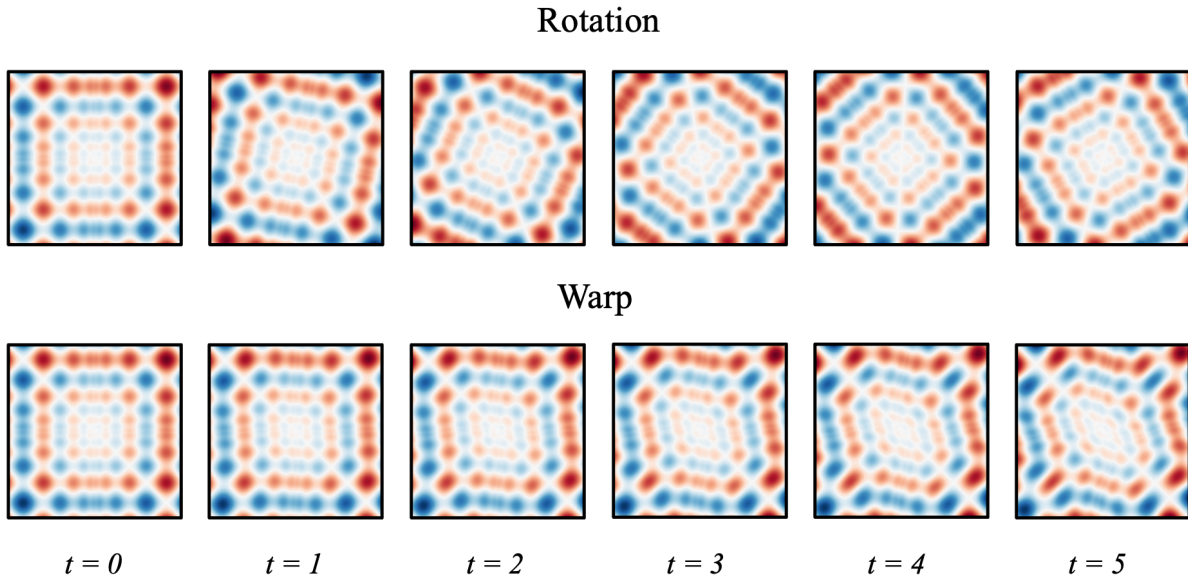

Figure 8. **Geometric transformations over six timesteps.** Each row corresponds to a different transformation: **Rotation** (top) (Eq. 4) and **Warp** (bottom) (Eq. 5). Time progresses from left to right. These transformations preserve underlying signal structure while altering spatial configuration, enabling evaluation of feature transfer under spatial misalignment.

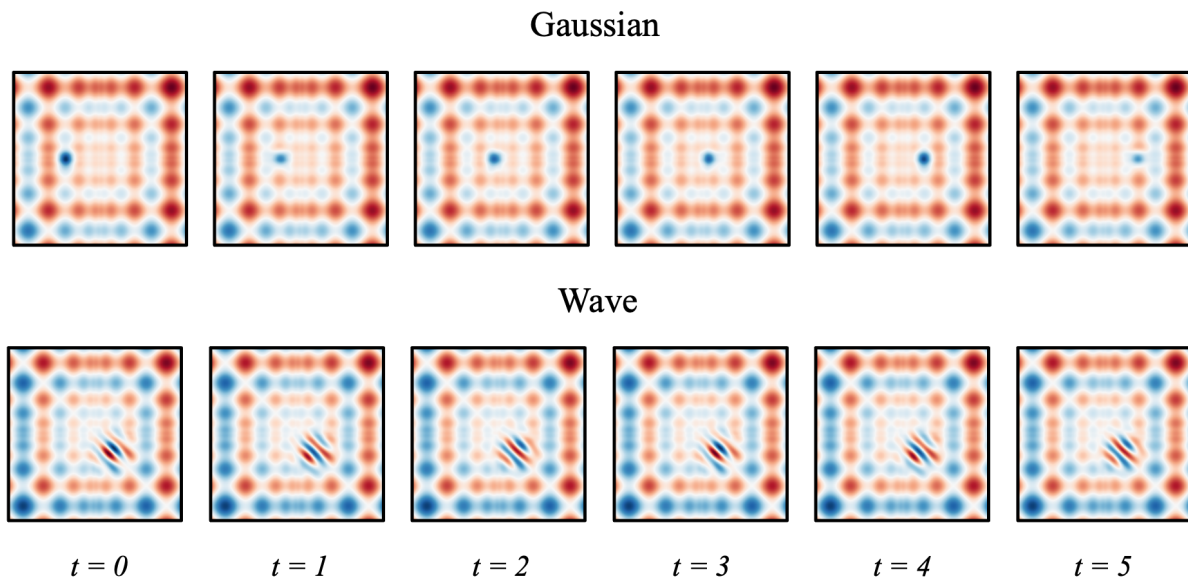

Figure 9. **Local transformations over six timesteps.** Each row corresponds to a different transformation: **Gaussian** (top) (Eq. 6) and **Wave** (bottom) (Eq. 7). Time progresses from left to right. These transformations emulate localized, time-evolving structures found in scientific systems, providing a controlled setting to assess transferability under known structural variations.
